# Supplementary material for: Natural History of Aerosol Induced Lassa Fever in Non-Human Primates
Source: PubMed Central journal article supplement (PMC7354473; doi:10.3390/v12060593), 2020-05-29
Supplement: viruses-12-00593-s001.pdf [file viruses-12-00593-s001.pdf]

1 **Table S1. Clinical Assessment Score of Non-Human Primates during the Natural History Study.**

|                        | GROUPS        | DPE 0       | DPE 1       | DPE 2       | DPE 3       | DPE 4    | DPE 5     | DPE 6     | DPE 7     | DPE 8     | DPE 9     | DPE 10    | DPE 11 | DPE 12 | DPE 13 | DPE 14 | DPE 15 | DPE 16 | DPE 17 | DPE 18 | DPE 19 | DPE 20 | DPE 21 |
|------------------------|---------------|-------------|-------------|-------------|-------------|----------|-----------|-----------|-----------|-----------|-----------|-----------|--------|--------|--------|--------|--------|--------|--------|--------|--------|--------|--------|
| MEAN CLINICAL SCORES   | ALL ANIMALS   | 0           | 0           | 0           | 0           | 0        | 0.13      | 0.25      | 0.31      | 0.42      | 0.60      | 0.93      | 1.00   | 1.21   | 1.63   | 0.83   | 1.17   | 0.58   | 0.58   | 0.67   | 0.67   | 0.67   | 0.42   |
| STAGE OF DISEASE       | ALL ANIMALS   | SUBCLINICAL | SUBCLINICAL | SUBCLINICAL | SUBCLINICAL | CLINICAL | CLINICAL  | CLINICAL  | CLINICAL  | DECOMP    | DECOMP    | DECOMP    | DECOMP | DECOMP | DECOMP | DECOMP | DECOMP | DECOMP | DECOMP | DECOMP | DECOMP | DECOMP | DECOMP |
| Responsiveness         | Survivor      | 0           | 0           | 0           | 0           | 0        | 0         | 0         | 0         | 0         | 1         | 2         | 2      | 2      | 2      | 1      | 2      | 1      | 1      | 1      | 1      | 1      | 0      |
| /Behavior              | Non-survivors | 0±0         | 0±0         | 0±0         | 0±0         | 0±0      | 0.33±0.58 | 0.33±0.59 | 0.33±0.60 | 0.33±0.61 | 1±1       | 2±1.73    | 1±0    | 1±0    | 3±0    | N/A    | N/A    | N/A    | N/A    | N/A    | N/A    | N/A    | N/A    |
| Rash                   | Survivor      | 0           | 0           | 0           | 0           | 0        | 0         | 0         | 0         | 0         | 0         | 0         | 0      | 0      | 0      | 0      | 0      | 0      | 0      | 0      | 0      | 0      | 0      |
|                        | Non-survivors | 0±0         | 0±0         | 0±0         | 0±0         | 0±0      | 0±0       | 0±0       | 0±0       | 0±0       | 0±0       | 0±0       | 0±0    | 0±0    | 1±0    | N/A    | N/A    | N/A    | N/A    | N/A    | N/A    | N/A    | N/A    |
| Bleeding               | Survivor      | 0           | 0           | 0           | 0           | 0        | 0         | 0         | 3         | 0         | 3         | 3         | 3      | 3      | 3      | 0      | 3      | 0      | 0      | 0      | 0      | 0      | 0      |
|                        | Non-survivors | 0±0         | 0±0         | 0±0         | 0±0         | 0±0      | 0±0       | 0±0       | 0±0       | 0±0       | 0±0       | 0±0       | 0±0    | 0±0    | 3±0    | N/A    | N/A    | N/A    | N/A    | N/A    | N/A    | N/A    | N/A    |
| GI Symptoms            | Survivor      | 0           | 0           | 0           | 0           | 0        | 1         | 1         | 1         | 3         | N/A       | 2         | 3      | 3      | 3      | 3      | 3      | 3      | 3      | 3      | 3      | 3      | 3      |
|                        | Non-survivors | 0±0         | 0±0         | 0±0         | 0±0         | 0±0      | 0±0       | 0.33±0.58 | 0.67±0.58 | 0.67±0.58 | 0.67±0.58 | N/A       | 2±0    | 2±0    | 2±0    | N/A    | N/A    | N/A    | N/A    | N/A    | N/A    | N/A    | N/A    |
| Food Consumption       | Survivor      | 0           | 0           | 0           | 0           | 0        | 0         | 0         | 2         | 2         | 2         | 2         | 3      | 3      | 3      | 3      | 2      | 2      | 1      | 1      | 1      | 1      | 1      |
|                        | Non-survivors | 0           | 0           | 0           | 0           | 0        | 1±1       | 1±1       | 2±0       | 2±0       | 2±0       | 3±1       | 3±0    | 3±0    | 3±0    | N/A    | N/A    | N/A    | N/A    | N/A    | N/A    | N/A    | N/A    |
| Urine Output           | Survivor      | 0           | 0           | 0           | 0           | 0        | 0         | 0         | 0         | 1         | 0         | 1         | 1      | 1      | 1      | 1      | 0      | 0      | 0      | 0      | 0      | 0      | 0      |
|                        | Non-survivors | 0±0         | 0±0         | 0±0         | 0±0         | 0±0      | 0.67±0.58 | 1±0       | 1±0       | 1±0       | 1±0       | 1±0       | 1±0    | 1±0    | 1±0    | N/A    | N/A    | N/A    | N/A    | N/A    | N/A    | N/A    | N/A    |
| Posture and Appearance | Survivor      | 0           | 0           | 0           | 0           | 0        | 0         | 0         | 0         | 2         | 2         | 3         | 3      | 3      | 1      | 2      | 1      | 1      | 1      | 1      | 1      | 1      | 0      |
|                        | Non-survivors | 0±0         | 0±0         | 0±0         | 0±0         | 0±0      | 0±0       | 0±0       | 0±0       | 0.33±0.58 | 0.33±0.58 | 2.33±2.08 | 2±0    | 2±0    | 4±0    | N/A    | N/A    | N/A    | N/A    | N/A    | N/A    | N/A    | N/A    |
| Edema                  | Survivor      | 0           | 0           | 0           | 0           | 0        | 0         | 0         | 0         | 0         | 0         | 0         | 0      | 0      | 0      | 0      | 0      | 0      | 0      | 0      | 0      | 0      | 0      |
|                        | Non-survivors | 0±0         | 0±0         | 0±0         | 0±0         | 0±0      | 0±0       | 0±0       | 0±0       | 0±0       | 0±0       | 0±0       | 0±0    | 0±0    | 3±0    | N/A    | N/A    | N/A    | N/A    | N/A    | N/A    | N/A    | N/A    |
| Respiration            | Survivor      | 0           | 0           | 0           | 0           | 0        | 0         | 0         | 0         | 0         | 0         | 0         | 0      | 0      | 0      | 0      | 0      | 0      | 0      | 0      | 0      | 0      | 0      |
|                        | Non-survivors | 0±0         | 0±0         | 0±0         | 0±0         | 0±0      | 0±0       | 0±0       | 0±0       | 0±0       | 0±0       | 0±0       | 0±0    | 0±0    | 0±0    | N/A    | N/A    | N/A    | N/A    | N/A    | N/A    | N/A    | N/A    |
| Exudate                | Survivor      | 0           | 0           | 0           | 0           | 0        | 0         | 0         | 0         | 0         | 0         | 0         | 0      | 0      | 0      | 0      | 0      | 0      | 0      | 0      | 0      | 0      | 0      |
|                        | Non-survivors | 0±0         | 0±0         | 0±0         | 0±0         | 0±0      | 0±0       | 0±0       | 0±0       | 0±0       | 0±0       | 0±0       | 0±0    | 0±0    | 1±0    | N/A    | N/A    | N/A    | N/A    | N/A    | N/A    | N/A    | N/A    |
| Neurological Function  | Survivor      | 0           | 0           | 0           | 0           | 0        | 0         | 0         | 0         | 1         | 1         | 1         | 1      | 1      | 1      | 1      | 0      | 0      | 1      | 1      | 1      | 1      | 1      |
|                        | Non-survivors | 0±0         | 0±0         | 0±0         | 0±0         | 0±0      | 0±0       | 0±0       | 0±0       | 0±0       | 0±0       | 1.67±1.53 | 0±0    | 0±0    | 1±0    | N/A    | N/A    | N/A    | N/A    | N/A    | N/A    | N/A    | N/A    |
| Vocalization           | Survivor      | 0           | 0           | 0           | 0           | 0        | 0         | 0         | 0         | 0         | 0         | 0         | 0      | 0      | 0      | 0      | 0      | 0      | 1      | 1      | 1      | 1      | 0      |
|                        | Non-survivors | 0±0         | 0±0         | 0±0         | 0±0         | 0±0      | 0±0       | 0±0       | 0±0       | 0±0       | 0±0       | 0.33±0.58 | 0±0    | 1±0    | 1±0    | N/A    | N/A    | N/A    | N/A    | N/A    | N/A    | N/A    | N/A    |

2

|                        | GROUPS        | DPE 22 | DPE 23 | DPE 24 | DPE 25 | DPE 26 | DPE 27 | DPE 28 | DPE 29 | DPE 30   | DPE 31   | DPE 32   | DPE 33   | DPE 34   | DPE 35   | DPE 36   | DPE 37   | DPE 38   | DPE 39   | DPE 40   | DPE 41   |          |
|------------------------|---------------|--------|--------|--------|--------|--------|--------|--------|--------|----------|----------|----------|----------|----------|----------|----------|----------|----------|----------|----------|----------|----------|
| MEAN CLINICAL SCORES   | ALL ANIMALS   | 0.42   | 0.42   | 0      | 0      | 0      | 0      | 0      | 0      | 0        | 0        | 0        | 0        | 0        | 0        | 0        | 0        | 0        | 0        | 0        | 0        | 0        |
| STAGE OF DISEASE       | ALL ANIMALS   | DECOMP | DECOMP | DECOMP | DECOMP | DECOMP | DECOMP | DECOMP | DECOMP | RECOVERY | RECOVERY | RECOVERY | RECOVERY | RECOVERY | RECOVERY | RECOVERY | RECOVERY | RECOVERY | RECOVERY | RECOVERY | RECOVERY | RECOVERY |
| Responsiveness         | Survivor      | 0      | 0      | 0      | 0      | 0      | 0      | 0      | 0      | 0        | 0        | 0        | 0        | 0        | 0        | 0        | 0        | 0        | 0        | 0        | 0        | 0        |
| /Behavior              | Non-survivors | N/A    | N/A    | N/A    | N/A    | N/A    | N/A    | N/A    | N/A    | N/A      | N/A      | N/A      | N/A      | N/A      | N/A      | N/A      | N/A      | N/A      | N/A      | N/A      | N/A      | N/A      |
| Rash                   | Survivor      | 0      | 0      | 0      | 0      | 0      | 0      | 0      | 0      | 0        | 0        | 0        | 0        | 0        | 0        | 0        | 0        | 0        | 0        | 0        | 0        | 0        |
|                        | Non-survivors | N/A    | N/A    | N/A    | N/A    | N/A    | N/A    | N/A    | N/A    | N/A      | N/A      | N/A      | N/A      | N/A      | N/A      | N/A      | N/A      | N/A      | N/A      | N/A      | N/A      | N/A      |
| Bleeding               | Survivor      | 0      | 0      | 0      | 0      | 0      | 0      | 0      | 0      | 0        | 0        | 0        | 0        | 0        | 0        | 0        | 0        | 0        | 0        | 0        | 0        | 0        |
|                        | Non-survivors | N/A    | N/A    | N/A    | N/A    | N/A    | N/A    | N/A    | N/A    | N/A      | N/A      | N/A      | N/A      | N/A      | N/A      | N/A      | N/A      | N/A      | N/A      | N/A      | N/A      | N/A      |
| GI Symptoms            | Survivor      | 3      | 3      | 0      | 0      | 0      | 0      | 0      | 0      | 0        | 0        | 0        | 0        | 0        | 0        | 0        | 0        | 0        | 0        | 0        | 0        | 0        |
|                        | Non-survivors | N/A    | N/A    | N/A    | N/A    | N/A    | N/A    | N/A    | N/A    | N/A      | N/A      | N/A      | N/A      | N/A      | N/A      | N/A      | N/A      | N/A      | N/A      | N/A      | N/A      | N/A      |
| Food Consumption       | Survivor      | 1      | 1      | 0      | 0      | 0      | 0      | 0      | 0      | 0        | 0        | 0        | 0        | 0        | 0        | 0        | 0        | 0        | 0        | 0        | 0        | 0        |
|                        | Non-survivors | N/A    | N/A    | N/A    | N/A    | N/A    | N/A    | N/A    | N/A    | N/A      | N/A      | N/A      | N/A      | N/A      | N/A      | N/A      | N/A      | N/A      | N/A      | N/A      | N/A      | N/A      |
| Urine Output           | Survivor      | 0      | 0      | 0      | 0      | 0      | 0      | 0      | 0      | 0        | 0        | 0        | 0        | 0        | 0        | 0        | 0        | 0        | 0        | 0        | 0        | 0        |
|                        | Non-survivors | N/A    | N/A    | N/A    | N/A    | N/A    | N/A    | N/A    | N/A    | N/A      | N/A      | N/A      | N/A      | N/A      | N/A      | N/A      | N/A      | N/A      | N/A      | N/A      | N/A      | N/A      |
| Posture and Appearance | Survivor      | 0      | 0      | 0      | 0      | 0      | 0      | 0      | 0      | 0        | 0        | 0        | 0        | 0        | 0        | 0        | 0        | 0        | 0        | 0        | 0        | 0        |
|                        | Non-survivors | N/A    | N/A    | N/A    | N/A    | N/A    | N/A    | N/A    | N/A    | N/A      | N/A      | N/A      | N/A      | N/A      | N/A      | N/A      | N/A      | N/A      | N/A      | N/A      | N/A      | N/A      |
| Edema                  | Survivor      | 0      | 0      | 0      | 0      | 0      | 0      | 0      | 0      | 0        | 0        | 0        | 0        | 0        | 0        | 0        | 0        | 0        | 0        | 0        | 0        | 0        |
|                        | Non-survivors | N/A    | N/A    | N/A    | N/A    | N/A    | N/A    | N/A    | N/A    | N/A      | N/A      | N/A      | N/A      | N/A      | N/A      | N/A      | N/A      | N/A      | N/A      | N/A      | N/A      | N/A      |
| Respiration            | Survivor      | 0      | 0      | 0      | 0      | 0      | 0      | 0      | 0      | 0        | 0        | 0        | 0        | 0        | 0        | 0        | 0        | 0        | 0        | 0        | 0        | 0        |
|                        | Non-survivors | N/A    | N/A    | N/A    | N/A    | N/A    | N/A    | N/A    | N/A    | N/A      | N/A      | N/A      | N/A      | N/A      | N/A      | N/A      | N/A      | N/A      | N/A      | N/A      | N/A      | N/A      |
| Exudate                | Survivor      | 0      | 0      | 0      | 0      | 0      | 0      | 0      | 0      | 0        | 0        | 0        | 0        | 0        | 0        | 0        | 0        | 0        | 0        | 0        | 0        | 0        |
|                        | Non-survivors | N/A    | N/A    | N/A    | N/A    | N/A    | N/A    | N/A    | N/A    | N/A      | N/A      | N/A      | N/A      | N/A      | N/A      | N/A      | N/A      | N/A      | N/A      | N/A      | N/A      | N/A      |
| Neurological Function  | Survivor      | 1      | 1      | 0      | 0      | 0      | 0      | 0      | 0      | 0        | 0        | 0        | 0        | 0        | 0        | 0        | 0        | 0        | 0        | 0        | 0        | 0        |
|                        | Non-survivors | N/A    | N/A    | N/A    | N/A    | N/A    | N/A    | N/A    | N/A    | N/A      | N/A      | N/A      | N/A      | N/A      | N/A      | N/A      | N/A      | N/A      | N/A      | N/A      | N/A      | N/A      |
| Vocalization           | Survivor      | 0      | 0      | 0      | 0      | 0      | 0      | 0      | 0      | 0        | 0        | 0        | 0        | 0        | 0        | 0        | 0        | 0        | 0        | 0        | 0        | 0        |
|                        | Non-survivors | N/A    | N/A    | N/A    | N/A    | N/A    | N/A    | N/A    | N/A    | N/A      | N/A      | N/A      | N/A      | N/A      | N/A      | N/A      | N/A      | N/A      | N/A      | N/A      | N/A      | N/A      |

3

4 **Table S1. Clinical Assessment Score of Non-Human Primates during the Natural History Study.** Score codes during clinical assessment are normal (0), very mild (1), mild (2),  
5 moderate (3), and severe (4) for responsiveness/behavior, rash, bleeding, gastrointestinal (GI) symptoms, posture/appearance, and respiration. Score codes during the assessment are  
6 normal (0), mild (1), moderate (2), and severe (3) for food consumption, urine output, and edema. Vocalization assessment includes normal (0) and in distress (1). Exudate assessment  
7 includes normal (0) and present (1). Non-survivors (N=3, mean  $\pm$  SD) group was compared to Survivor (N=1). Indicators for stages of disease include mean clinical score of all  
8 animals and additional analysis. Subclinical stage of disease progression (DPE 0-3) is marked by mean clinical score of zero from the day of challenge until presentation of fever and  
9 virus. Identification of the clinical stage of infection (DPE 4-7) involved detection of fever and virus. The decompensated stage (DPE 8-29) was identified with mean clinical score  $\geq$   
10 0.4, peak viremia, alkalosis with blood pH  $> 7.5$ , and elevated liver and kidney functions marker levels. Recovery stage (Post-DPE 30) was establishing based on mean clinical score  
11 of zero for eleven days, viremia below 100 PFU/mL, blood pH  $< 7.5$ , and liver and kidney functions markers near baseline level.

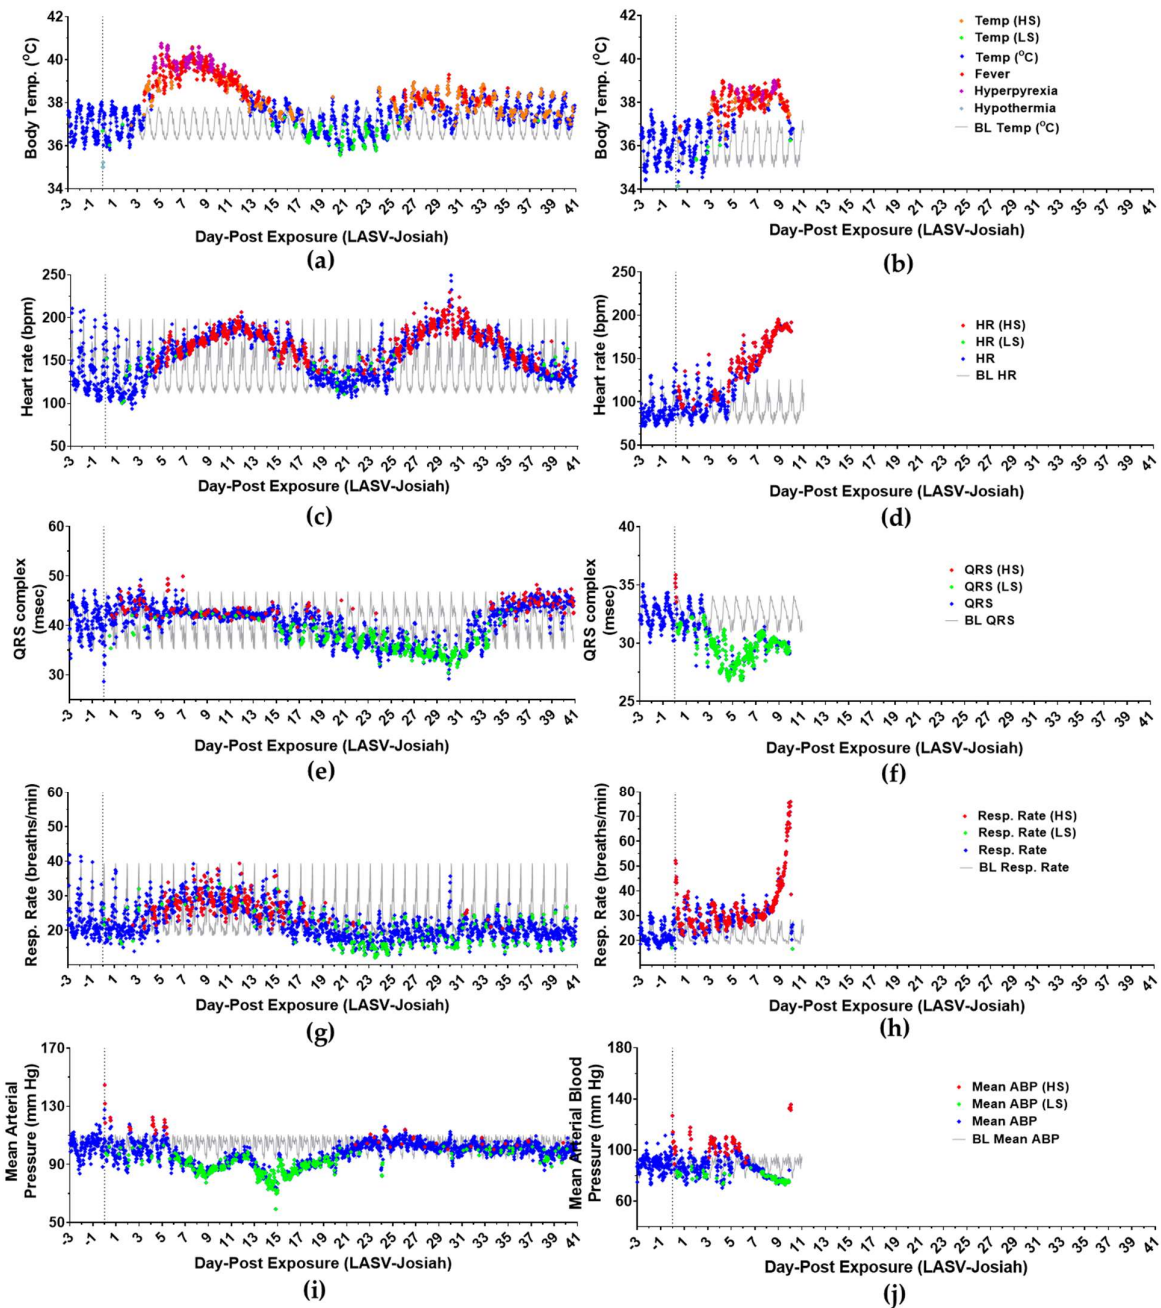

13 **Figure S1. Telemetric assessment of aerosol Lassa virus infected cynomolgus macaques.** (a)  
 14 Temperature of survivor, (b) temperature of non-survivor, (c) heart rate of survivor, (d) heart rate of  
 15 non-survivor, (e) QRS complex of survivor, (f) QRS complex of non-survivor, (g) respiratory rate of  
 16 survivor, (h) respiratory rate of non-survivor, (i) mean arterial blood pressure of survivor, and (j)  
 17 mean arterial blood pressure of non-survivor. ♦ HS (Values significantly higher: >3.0 SD from  
 18 corresponding baseline) ♦ LS (Values significantly lower: < 3.0 SD from corresponding baseline) ♦  
 19 (HS) ♦ Hyperpyrexia (> 3.0°C over baseline) ♦ Hypothermia (>2.0°C under baseline for longer than 2  
 20 hrs) ♦ Fever (> 1.5°C over baseline) — BL (Baseline) (Vertical grey dotted line: DPE 0).

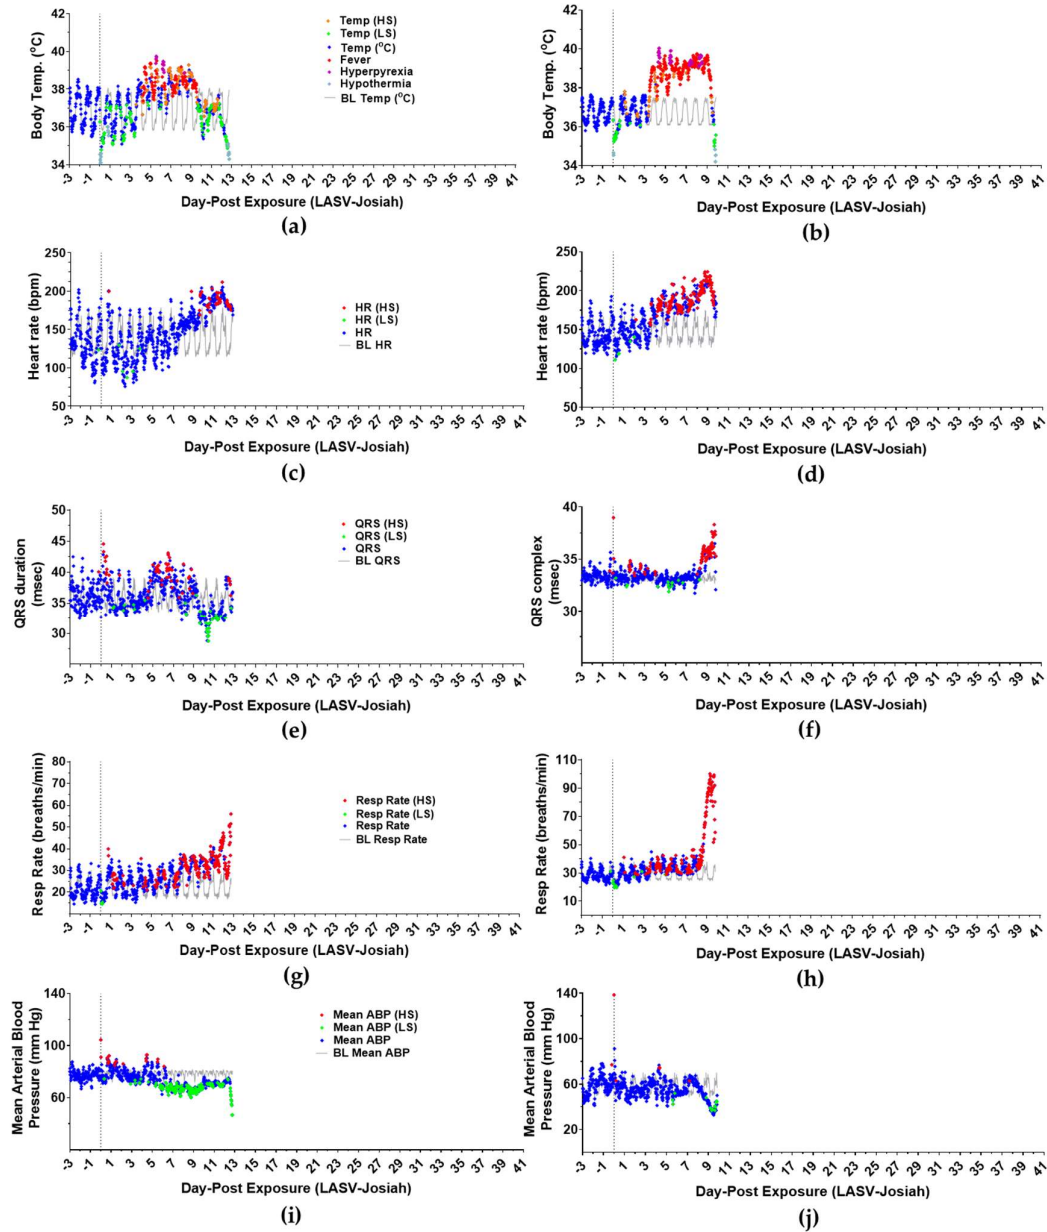

21

22 **Figure S2. Telemetric assessment of aerosol Lassa virus infected non-survivors.** (a) Temperature of  
 23 D13:non-survivor (b) Temperature of D10:non-survivor.2 (c) Heart rate of D13:non-survivor (d) Heart  
 24 rate of D10:non-survivor.2 (e) QRS complex of D13:non-survivor (f) QRS complex of D10:non-  
 25 survivor.2 (g) Respiratory rate of D13:non-survivor (h) Respiratory rate of D10:non-survivor.2 (i)  
 26 Mean arterial blood pressure of D13:non-survivor (j) Mean arterial blood pressure of D10:non-  
 27 survivor.2. ♦ HS (Values significantly higher: >3.0 SD from corresponding baseline) ♦ LS (Values  
 28 significantly lower: < 3.0 SD from corresponding baseline) ♦ (HS) ♦ Hyperpyrexia (> 3.0°C over  
 29 baseline) ♦ Hypothermia (>2.0°C under baseline for longer than 2 hrs) ♦ Fever (> 1.5°C over baseline)  
 30 — BL (Baseline) (Vertical grey dotted line: DPE 0).

31

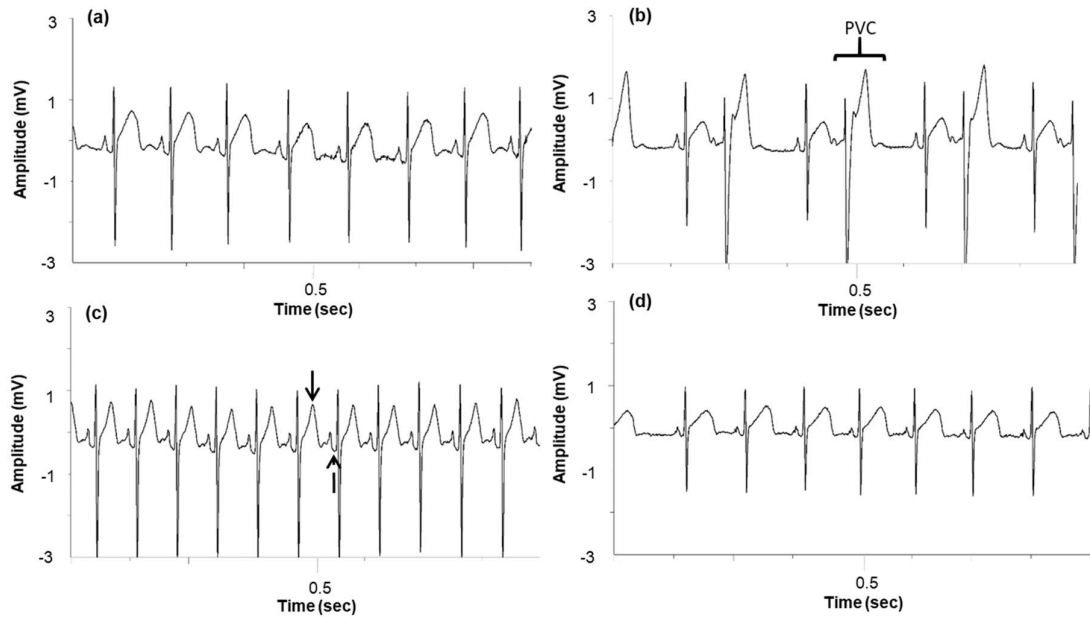

32

33 **Figure S3. Survivor, ECG highlights.** (a) Baseline: prior to challenge. (b) Baseline: prior to challenge  
 34 with premature ventricular complexes. (bracket). (c) Post-challenge (DPE 8): sinus tachycardia with  
 35 subtle PR depression (dashed arrow) and peaked T-waves (solid arrow). (d) During recovery from  
 36 infection (DPE 19): resolution of sinus tachycardia, PR depression, and peaked T-waves. Note  
 37 decreased voltage of the QRS complex, which could suggest the presence of a pericardial effusion.

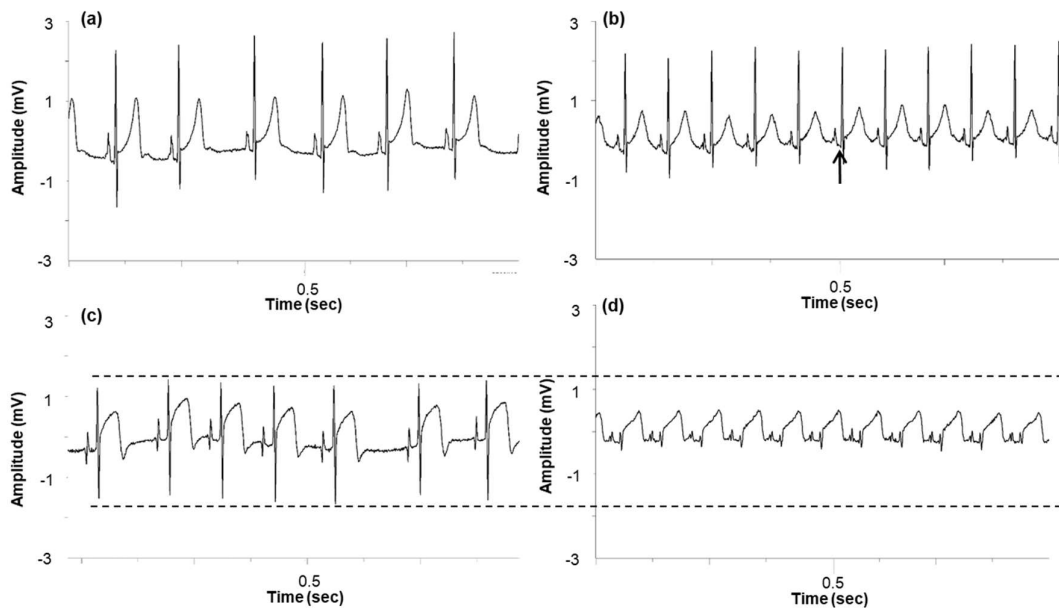

38

39 **Figure S4. D10:Non-survivor and D10:Non-survivor.2 ECG highlights.** (a) ■D10:Non-survivor:  
 40 prior to challenge. (b) ■D10:Non-survivor post-challenge (DPE 8): sinus tachycardia and subtle PR  
 41 depression (solid arrow). (c) ▼D10:Non-survivor.2: prior to challenge. (d) ▼D10:Non-survivor (DPE  
 42 9): displaying decreased QRS voltage, which could suggest the presence of a pericardial effusion.  
 43 Dashed line illustrates the QRS voltage difference between DPE 0 and DPE 9.

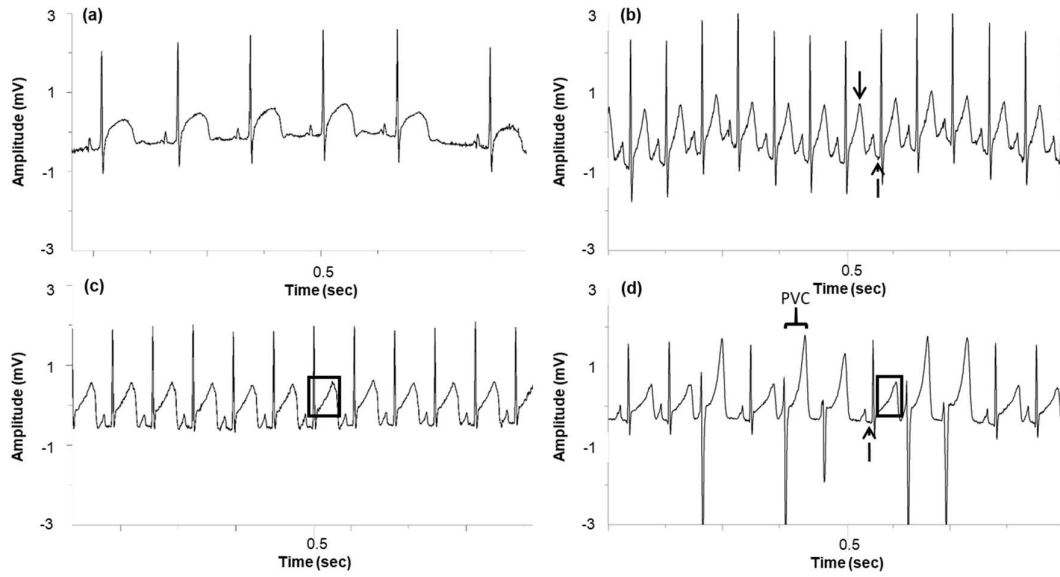

44

45 **Figure S5. D13: Non-survivor ECG highlights.** (a) Baseline: prior to challenge. (b) DPE 6: sinus  
 46 tachycardia, subtle PR depression (dashed line), and peaked T waves (solid line). (c) DPE 12: sinus  
 47 tachycardia with up-sloping ST segment (box). (d) DPE 12: similar findings to (b) and (c) with  
 48 premature ventricular complexes.

49

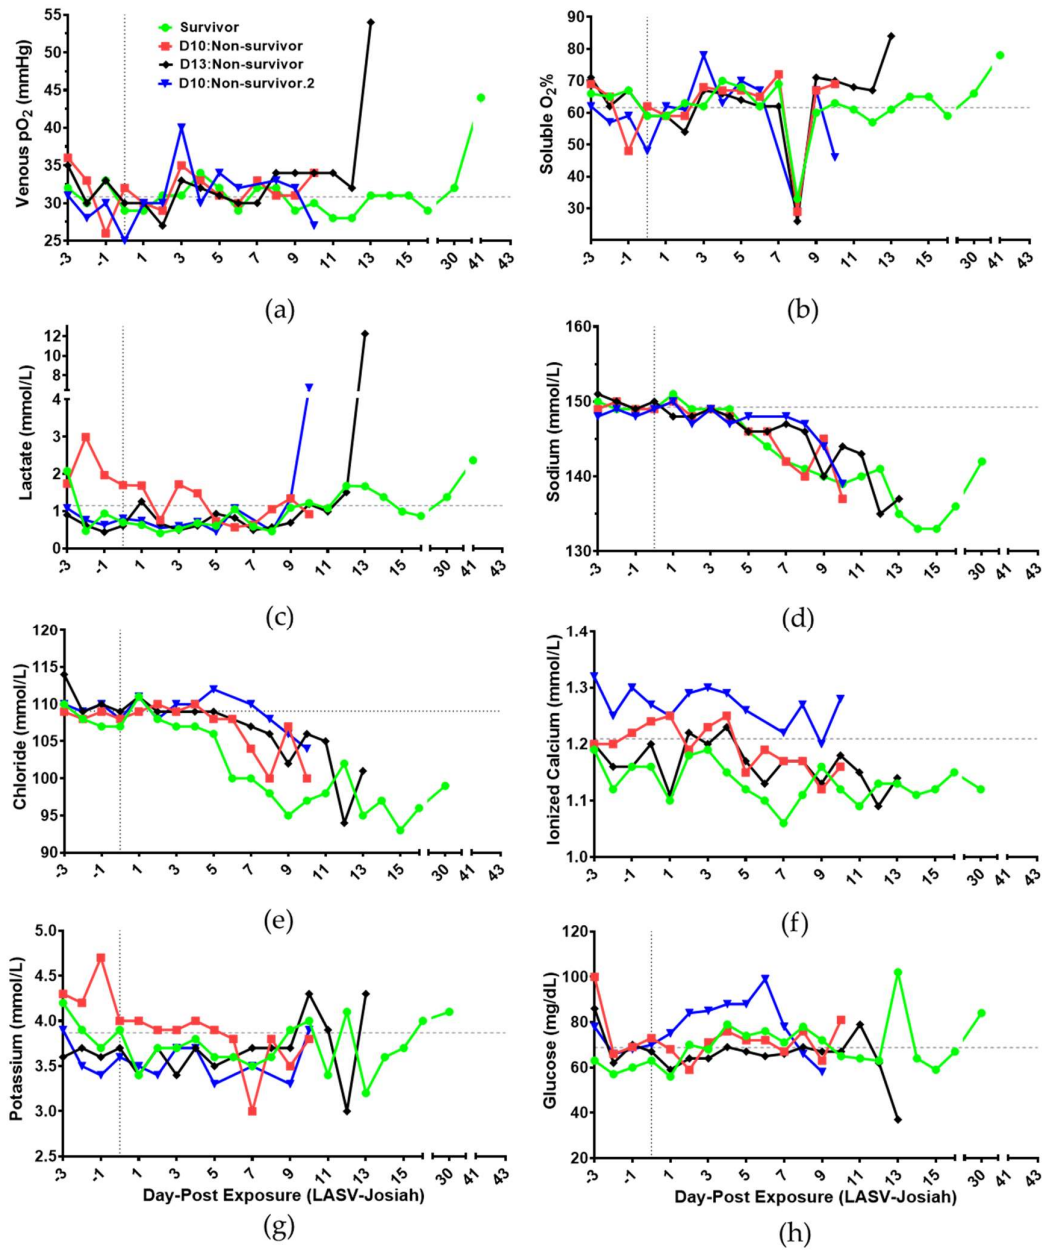

50

51 **Figure S6. Time course of blood gas and ion-related clinical chemistry in aerosol Lassa virus-**  
 52 **challenged cynomolgus macaques.** Detection of (a) partial pressure of oxygen:  $pO_2$ , (b) soluble  $O_2\%$ ,  
 53 and (c) lactate in whole blood were conducted using i-Stat 1 CG4+. Plasma (d) sodium, (e) chloride,  
 54 (f) ionized calcium, (g) potassium, and (h) glucose were detected iStat-1 CHEM8+. (●Survivor)  
 55 (■D10:Non-survivor) (◆D13:Non-survivor) (▼D10:Non-survivor.2) (Vertical grey dotted line: DPE 0)  
 56 Grey dashed line is average relative to each animal for DPE -3 to DPE 0.

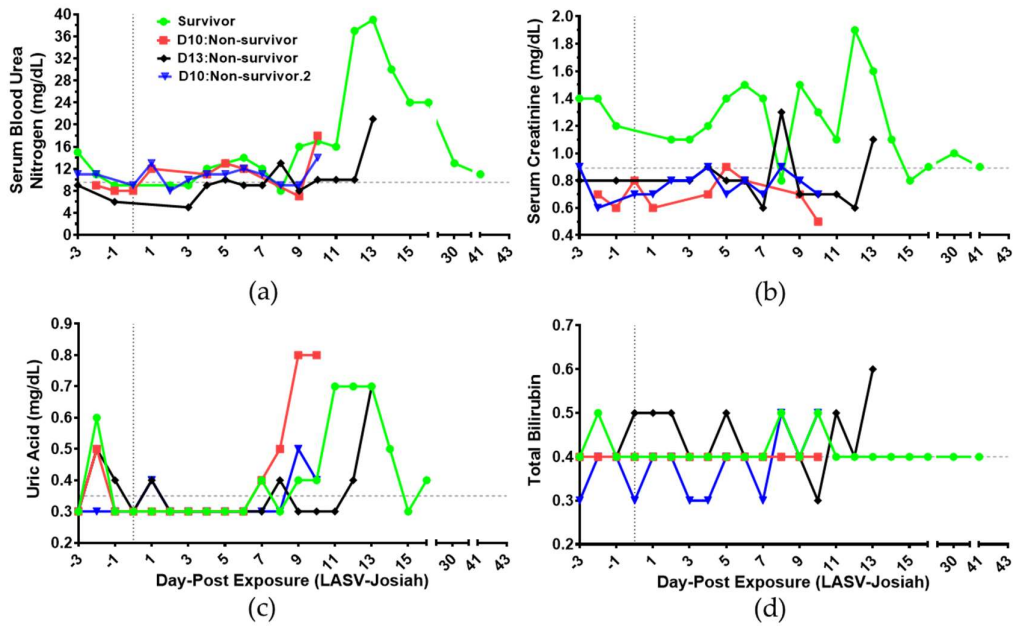

57

58 **Figure S7. Time course of clinical chemistry in aerosol Lassa virus-challenged cynomolgus**  
 59 **macaques.** (a) serum blood-urea-nitrogen (BUN), (b) serum creatinine (CRE), (c) plasma uric acid,  
 60 and (d) plasma total bilirubin (Piccolo). (●Survivor) (■D10:Non-survivor) (◆D13:Non-survivor)  
 61 (▼D10:Non-survivor.2) (Vertical grey dotted line: DPE 0) Grey dashed line is average relative to each  
 62 animal for DPE -3 to DPE 0.

63

64



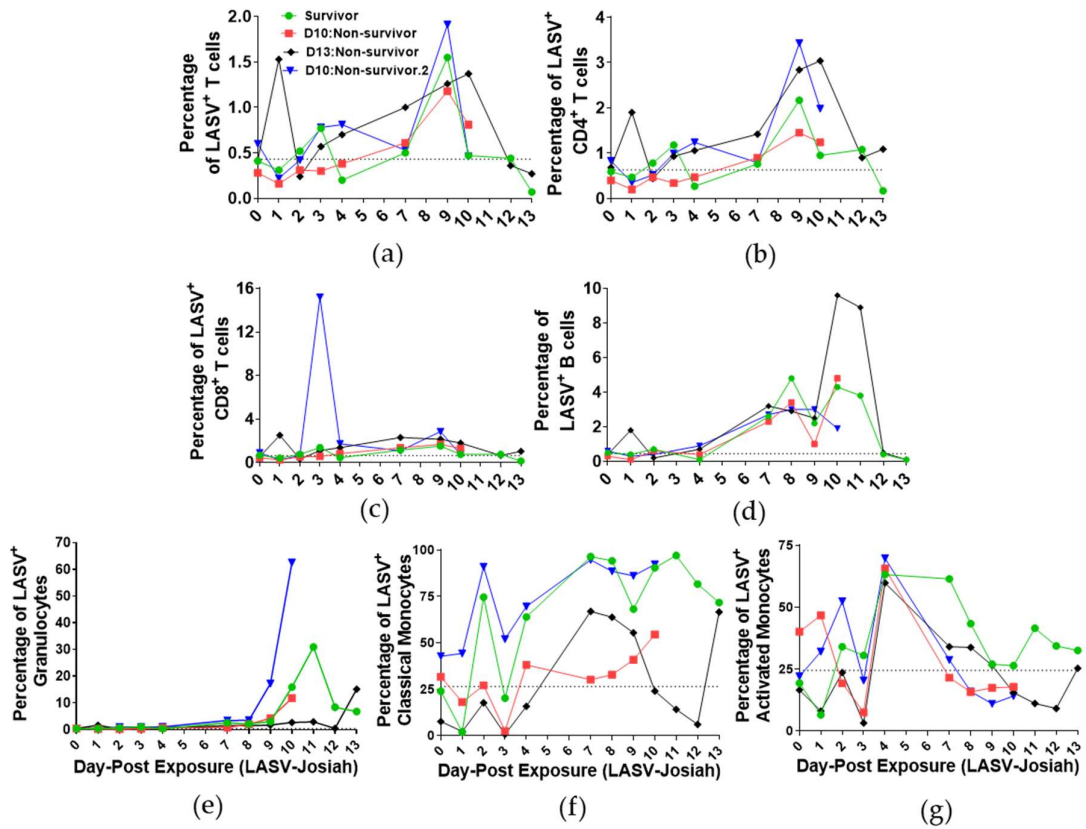

65

66

67

68

69

70

**Figure S8. Analysis of LASV-positive lymphocytes in blood of aerosol infected cynomolgus macaques.** Percentage of LASV-positive cells, (a) T cells, (b) CD4<sup>+</sup> T cells, (c) CD8<sup>+</sup> T cells, and (d) B cells, (e) granulocytes, (f) classical monocytes, and (g) activated monocytes detected in blood from day DPE 0 through DPE 13. Horizontal dash line is average at DPE 0. (● Survivor) (■ D10:Non-survivor) (◆ D13:Non-survivor) (▼ D10:Non-survivor.2)

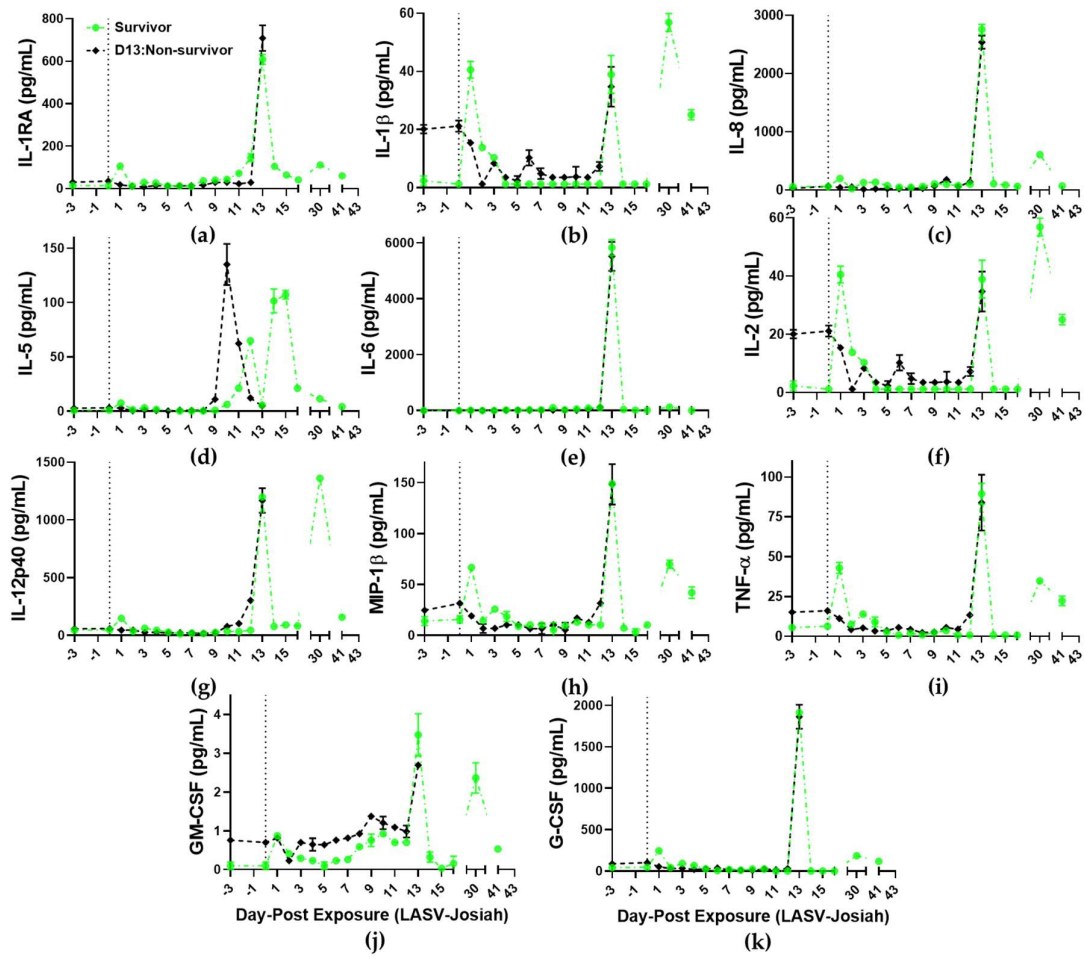

72

73 **Figure S9. Cytokine analysis of blood from LASV challenged rhesus macaques.** Assessment was  
 74 performed on samples for (a) IL-1RA, (b) IL-1 $\beta$ , (c) IL-2, (d) IL-5, (e) IL-6, (f) IL-8, (g) IL-12p40, (h)  
 75 MIP-1 $\beta$ , (i) TNF $\alpha$ , (j) GM-CSF, and (k) G-CSF collected 3 days prior to exposure and DPE 0-41.  
 76 (●Survivor) (◆D13:Non-survivor)

77

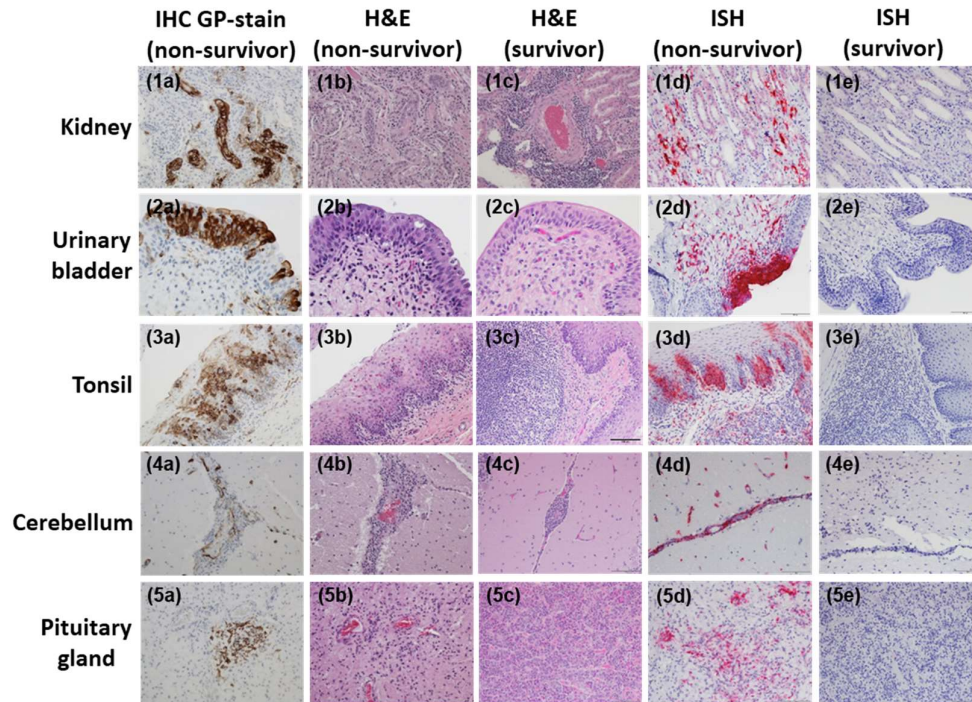

78 **Figure S10. Pathological assessment of tissues of aerosol infected non-human primates.** Kidney  
79 (1a-1e, 20X), urinary bladder (2a-2e, 20X), tonsil (3a-3e, 20X), cerebellum (4a-4e, 20X), and pituitary  
80 gland (5a-5e, 40X). Tissues were from ● survivor (all tissues), ■ D10:non-survivor (cerebellum) and ▼  
81 D10:non-survivor (kidney, urinary bladder, tonsil, and pituitary gland). Tissue sections embedded in  
82 paraffin were stained for LASV GP2 in non-survivor (IHC-GP: Fig. 1-5a), H&E stain for non-survivor  
83 (Fig. 1-5b), and H&E stain for survivor at DPE 41 (Fig. 1-5c). Detection of viral genomic RNA was  
84 performed using nucleic acid probe, targeting the polymerase gene with the L segment at sequence  
85 466-1433, in non-survivors at DPE 10 (Fig. 1-5d) and absent in the survivor at DPE 41 (Fig. 1-5e) on  
86 far right column.
